# Supplementary material for: Shallow subsurface geology and seismic microzonation in a deep continental basin. The Avezzano Town, Fucino basin (central Italy)
Source: Copernicus journal article supplement (doi:10.5194/nhess-2016-313), 2016-10-26

**Geomorphological elements**

- Active (steepest) slope (small thickness)**: Represented by a red star symbol.
- Subsided fan**: Represented by a green triangle symbol.
- Morphological scarps edge (H=20 m)**: Represented by a blue line with a small triangle.
- Morphological scarps edge (H=10 m)**: Represented by a blue line with a small triangle.
- Morphological scarps edge (H=5 m)**: Represented by a blue line with a small triangle.
- Fluvial terraces edge (H=20 m)**: Represented by a blue line with a small triangle.
- Fluvial terraces edge (H=10 m)**: Represented by a blue line with a small triangle.
- Fluvial terraces edge (H=5 m)**: Represented by a blue line with a small triangle.

**Legend:**

- Geological Units**:
  - Quaternary Geological Units**:
    - Deposits and Holocene**: Represented by a light green box.
    - Anthropic paleo**: Holocenic structures and backfill material with mixed gravels, the prevailing feature in the area - Holocene.
    - Fra**: **Landslide deposits** (Frac. Holocene).
    - Clay**: **Clayey colluvial deposits** (Clay. Holocene) (transformed to homogeneous features, see in Mediterranean areas and sandy gravels in a silty clay matrix, see in medium density sands, see in the and water clay silty, clay gravels are often present). Upper Pleistocene - Holocene.

**Scale**: Scale edge of geomorphological units (that scale according to some Authors).

**Avalanche and fluid-suspension deposits (A0)**

**A02** Recent or historical (A02) - rounded to sub-rounded calcareous grains, loose or slightly cemented, sands or silty-sands (underlying the San Felipe avalanche flow and other shallow deposits of the GARG slip, Upper Pleistocene p.p. - Holocene)

**Avalanche deposits of the Colares and Villa Matapán shallow flow (A02)**

Avalanche deposits and closely graded in a sandy matrix, occasionally indurated. The composition is light and in some cases they are cemented. These materials corresponded to the slope above the Villa Matapán flow and San Pedro (CAGRI, 1990; 1992; and CAGRI, 1992) and to the syn- and post-liquefaction of the CAGRI-90 (CAGRI, 1990; 1992)

**Slope Instabilities**

Creep

Sinkhole

[illegible]

|                               |                                                                                                                                                                                                                                 |                                                                                   |                                                                                                                                                                                                                                                                                                                                                                                    |
|-------------------------------|---------------------------------------------------------------------------------------------------------------------------------------------------------------------------------------------------------------------------------|-----------------------------------------------------------------------------------|------------------------------------------------------------------------------------------------------------------------------------------------------------------------------------------------------------------------------------------------------------------------------------------------------------------------------------------------------------------------------------|
| Lake and marsh deposits (Lac) | <p><b>Recent and Historical lacustrine deposits (Lac3):</b> Grey-bluish, clayey silts passing upward to pale silts and sandy silts with sand interbeds, peat and pyroclastic lenses. They are firm to moderately firm. They</p> |  | <p><b>Potential slope instability for rockfall/slopping (source area):</b></p> <p>Corresponds to the area where condition (a) is fulfilled (9) (see chart The Monts area). In the southern part of the Arcovaz area, it derives from the extension of the coniformity by thin siltystone (Lac3) and pyroclastic horizons, when the strike becomes <math>&gt; 100^\circ</math>.</p> |
|-------------------------------|---------------------------------------------------------------------------------------------------------------------------------------------------------------------------------------------------------------------------------|-----------------------------------------------------------------------------------|------------------------------------------------------------------------------------------------------------------------------------------------------------------------------------------------------------------------------------------------------------------------------------------------------------------------------------------------------------------------------------|

[illegible]

Marine Geological Units (pre-Quaternary) (the nomenclature complies the CARM terminology)

**199** Isochrone of the top of the bedrock (in milliseconds, TWT; datum plane 600 m a.s.l.) (modified from Cavinato et al., 2002)

**UAM:** Clayey-sandy unit (UAM): Is the lower part, yellowish sandy calcarenites showing lozenge structures and thick to very thick layering with trace fossils (Cyathodes, lamellobarites (podolites, parolites), glauconite and ferrous oxides (Manganese Acetocyanide). In the upper part, thin layered, grey marls with planolitic foraminifera (Murena a Cribulana Acetocyanide). Upper Senonian / Tortonian p.p.

**Volumetric joint count, J<sub>v</sub>**

|                                                                                         |                                                                                         |
|-----------------------------------------------------------------------------------------|-----------------------------------------------------------------------------------------|
| 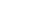 <10   | 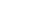 21-30 |
| 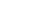 10-20 | 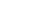 >30   |

The number inside the symbol indicates the punctual J<sub>v</sub> value

**CBZ** Carbon is released as **biochar CBZ**. Limestones colored by grey or whitish grey carbonaceous granules characterized by very thick, not well-defined layers and abundant Bryozoa and Lithothamnium.  
Langheim - Sierraalta

[illegible]

**RDT** **Calsani a Radici (RDT)** - Limestones constituted by white-beige mudstones showing medium to thick layers and rare bioclastic intercalations. Radici (lime-rich layers) are present at different levels.  
(Open Tivoli) - Santolini s.n.

|  |                                                                                                                                                                                                                                                                                                                                                                                                                          |  |                                                                                                               |
|--|--------------------------------------------------------------------------------------------------------------------------------------------------------------------------------------------------------------------------------------------------------------------------------------------------------------------------------------------------------------------------------------------------------------------------|--|---------------------------------------------------------------------------------------------------------------|
|  | <p><b>Calcani (Irreversibile) (BX)</b> Stratified limestone constituted by bioclastic mudstones and wackestones and characterized by the presence of paleosols and erosion surfaces. Bioclasts deposits are present at the base, with paleosol cavities (1° bioclast layer Autoclasts). Two kind and redded layers are present, at least, in the upper part (2° and 3° bioclast layers Autoclasts). Concretions p.p.</p> |  | <p>Evidence of liquefaction after the 1915 earthquake (Ossone, 1915; Liquefaction catalog by Galli, 2000)</p> |
|  | <p><b>Calcani (Irreversibile) (BX)</b> Stratified limestone constituted by bioclastic mudstones and wackestones and characterized by the presence of paleosols and erosion surfaces. Bioclasts deposits are present at the base, with paleosol cavities (1° bioclast layer Autoclasts). Two kind and redded layers are present, at least, in the upper part (2° and 3° bioclast layers Autoclasts). Concretions p.p.</p> |  | <p>Evidence of liquefaction from paleoseismological studies (Martinetto &amp; Galadini)</p>                   |

**[H1]** Calcani bioclastici superiori (BLS). Limestones constituted by white-greenish, bioclastic grainstone-rudstones, massive or not well-stratified, with Orbitolina and rudista fragments (prevailing *Caprinae*). Upper Aptian - Cenozoanale (p.).

**Key for abbreviations**

**Lac2 E3** = strength/  
consistency  
geologic unit = litho-technic unit

**Calcarei calcemiochi a gasteropodi (CGG)**- Limestones constituted by whitish-beige, wackestones-packstones containing intracolls, oncolites and desiccation structures in the upper part of layers. Thick or very thick layers (100–155 cm) alternate with decimetric layers of calcic, grey gnostolites (Dolles are often

Nemoral are present in the upper part, layers of breccia with black clasts and layers of greenish, calcic marl-clay can be observed. Bessarabian - Lower Bessarabian

Litho-technic Units

Geologic bedrock

**R1** - Stratified rocks, medium- to very thick bedded

|  |                                                          |
|--|----------------------------------------------------------|
|  | <b>S1</b> - Skulいた rocks, pelitic interlayers (20%-75%). |
|--|----------------------------------------------------------|

|                                                                                   |                                                                                                      |
|-----------------------------------------------------------------------------------|------------------------------------------------------------------------------------------------------|
|  | <p>C1-Granular, medium to poorly cemented bedrock.<br/>Grain-supported breccia and conglomerate.</p> |
|-----------------------------------------------------------------------------------|------------------------------------------------------------------------------------------------------|

Cover units

E1 - Unconsolidated, coarse granular soils  
Cobbles and boulders.

E2 - Unconsolidated, coarse granular soils  
Gravel

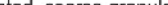
**E5** - Un cemented, coarse granular soils.  
Sandy gravel.
 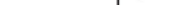
**E6** - Un cemented, coarse granular soils.
 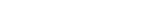
**E7** - Un cemented, coarse granular soils.
 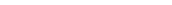
**E8** - Un cemented, coarse granular soils.
 
**E9** - Un cemented, coarse granular soils.
 
**E10** - Un cemented, coarse granular soils.
 
**E11** - Un cemented, coarse granular soils.
 
**E12** - Un cemented, coarse granular soils.
 
**E13** - Un cemented, coarse granular soils.
 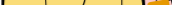
**E14** - Un cemented, coarse granular soils.
 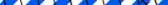
**E15** - Un cemented, coarse granular soils.
 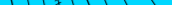
**E16** - Un cemented, coarse granular soils.
 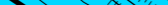
**E17** - Un cemented, coarse granular soils.
 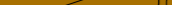
**E18** - Un cemented, coarse granular soils.
 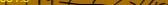
**E19** - Un cemented, coarse granular soils.
 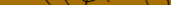
**E20** - Un cemented, coarse granular soils.
 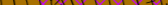
**E21** - Un cemented, coarse granular soils.
 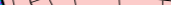
**E22** - Un cemented, coarse granular soils.
 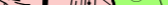
**E23** - Un cemented, coarse granular soils.
 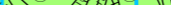
**E24** - Un cemented, coarse granular soils.
 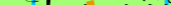
**E25** - Un cemented, coarse granular soils.
 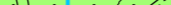
**E26** - Un cemented, coarse granular soils.
 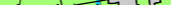
**E27** - Un cemented, coarse granular soils.
 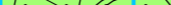
**E28** - Un cemented, coarse granular soils.
 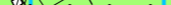
**E29** - Un cemented, coarse granular soils.
 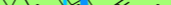
**E30** - Un cemented, coarse granular soils.
 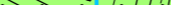
**E31** - Un cemented, coarse granular soils.
 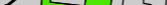
**E32** - Un cemented, coarse granular soils.
 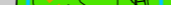
**E33** - Un cemented, coarse granular soils.
 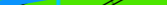
**E34** - Un cemented, coarse granular soils.
 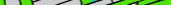
**E35** - Un cemented, coarse granular soils.
 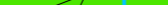
**E36** - Un cemented, coarse granular soils.
 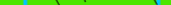
**E37** - Un cemented, coarse granular soils.
 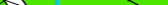
**E38** - Un cemented, coarse granular soils.
 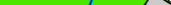
**E39** - Un cemented, coarse granular soils.
 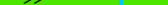
**E40** - Un cemented, coarse granular soils.
 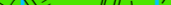
**E41** - Un cemented, coarse granular soils.
 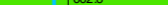
**E42** - Un cemented, coarse granular soils.
 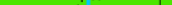
**E43** - Un cemented, coarse granular soils.
 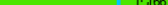
**E44** - Un cemented, coarse granular soils.
 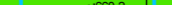
**E45** - Un cemented, coarse granular soils.
 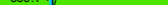
**E46** - Un cemented, coarse granular soils.
 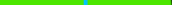
**E47** - Un cemented, coarse granular soils.
 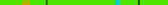
**E48** - Un cemented, coarse granular soils.
 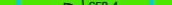
**E49** - Un cemented, coarse granular soils.
 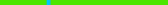
**E50** - Un cemented, coarse granular soils.
 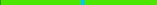
**E51** - Un cemented, coarse granular soils.


 F1 - Fine silt, Sb.

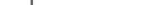
 F2 - Fine silt, Clay

|                                                                                                                               |                                |
|-------------------------------------------------------------------------------------------------------------------------------|--------------------------------|
| 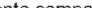 and different compactness/strength degree. |                                |
| Compactness of granular deposits:                                                                                             | Strength of cohesive deposits: |

|                       |                 |
|-----------------------|-----------------|
| II - Moderately dense | II - Very stiff |
| III - Poorly dense    | III - Stiff     |
| IV - Loose            | IV - Firm       |
|                       | V - Soft        |

Particular textural features:  
a - rock fragments with larger grain size  
b - interstitial, non-cohesive finer fraction

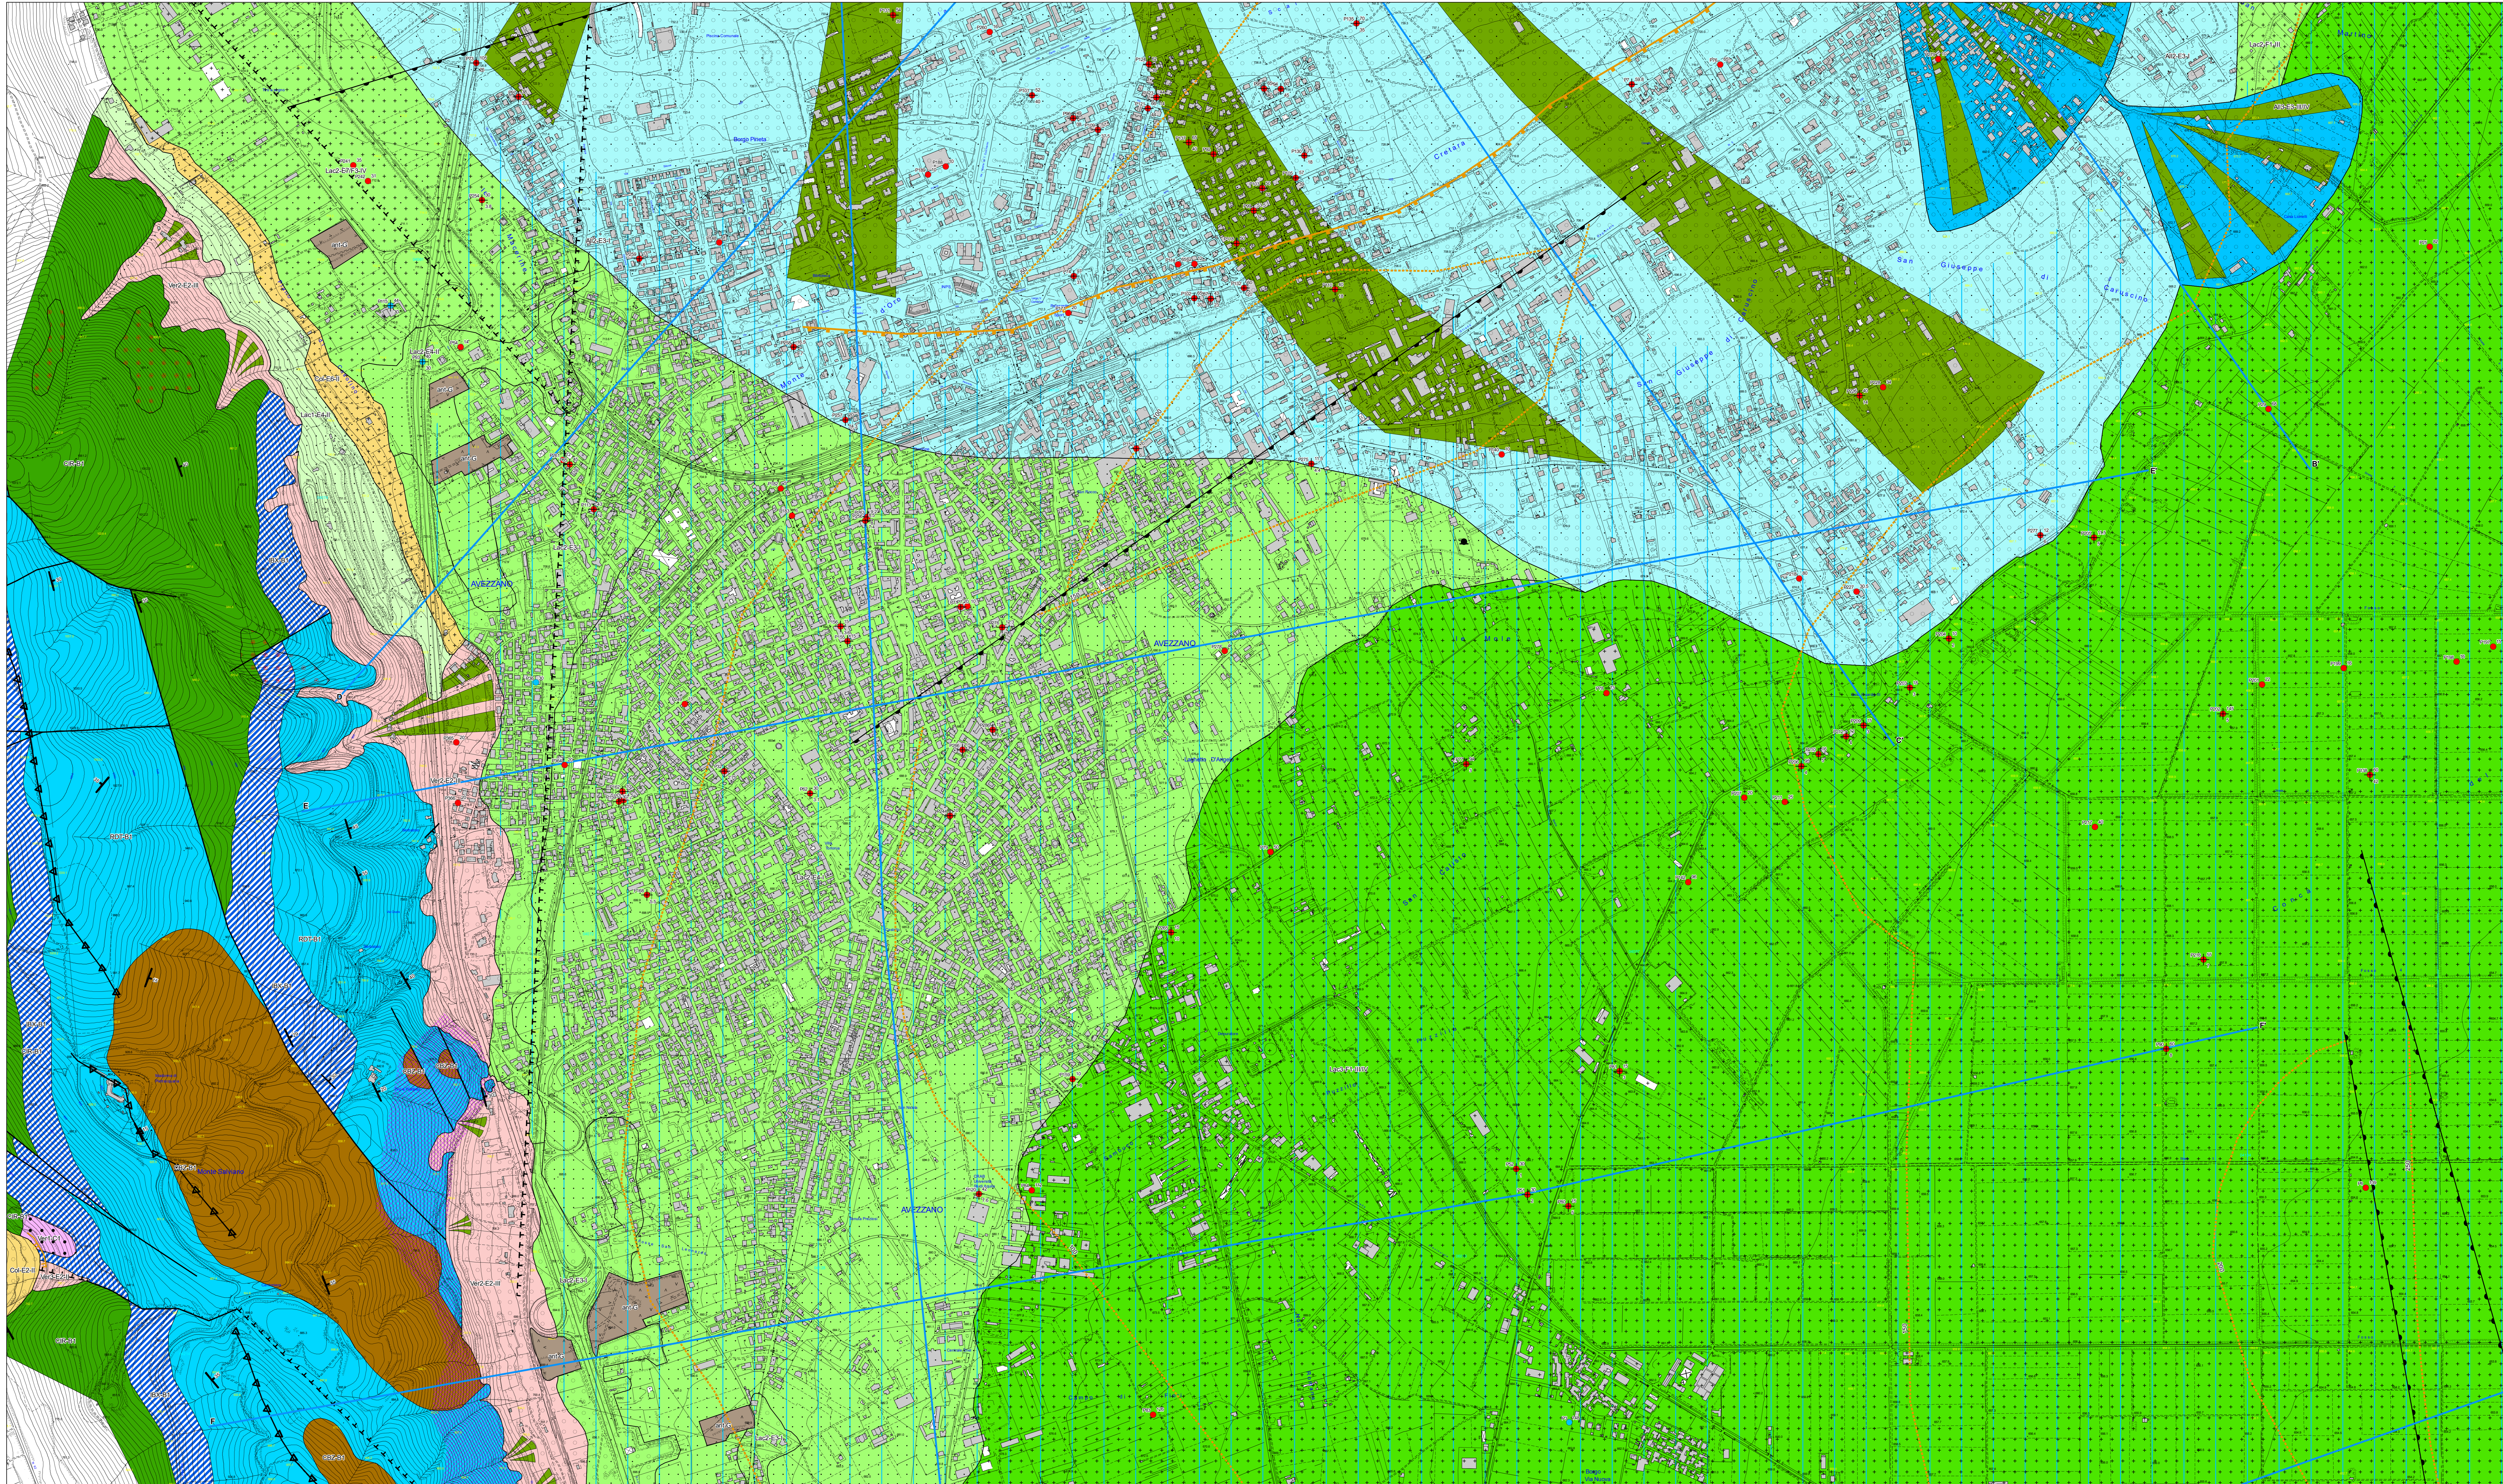

Supplement: Supplementary file 2 [file nhess-2016-313-supplement.zip › figS1.pdf]
