# Supplementary material for: Shallow subsurface geology and seismic microzonation in a deep continental basin. The Avezzano Town, Fucino basin (central Italy)
Source: Copernicus journal article supplement (doi:10.5194/nhess-2016-313), 2016-10-26
Supplement: Supplementary file 2 [file nhess-2016-313-supplement.zip]

Archive with 2 entries (2 files):
- figS1.pdf
- figS2.pdf
