# Supplementary figures and images for: Shallow subsurface geology and seismic microzonation in a deep continental basin. The Avezzano Town, Fucino basin (central Italy)
Source: Copernicus journal article supplement (doi:10.5194/nhess-2016-313), 2016-10-26

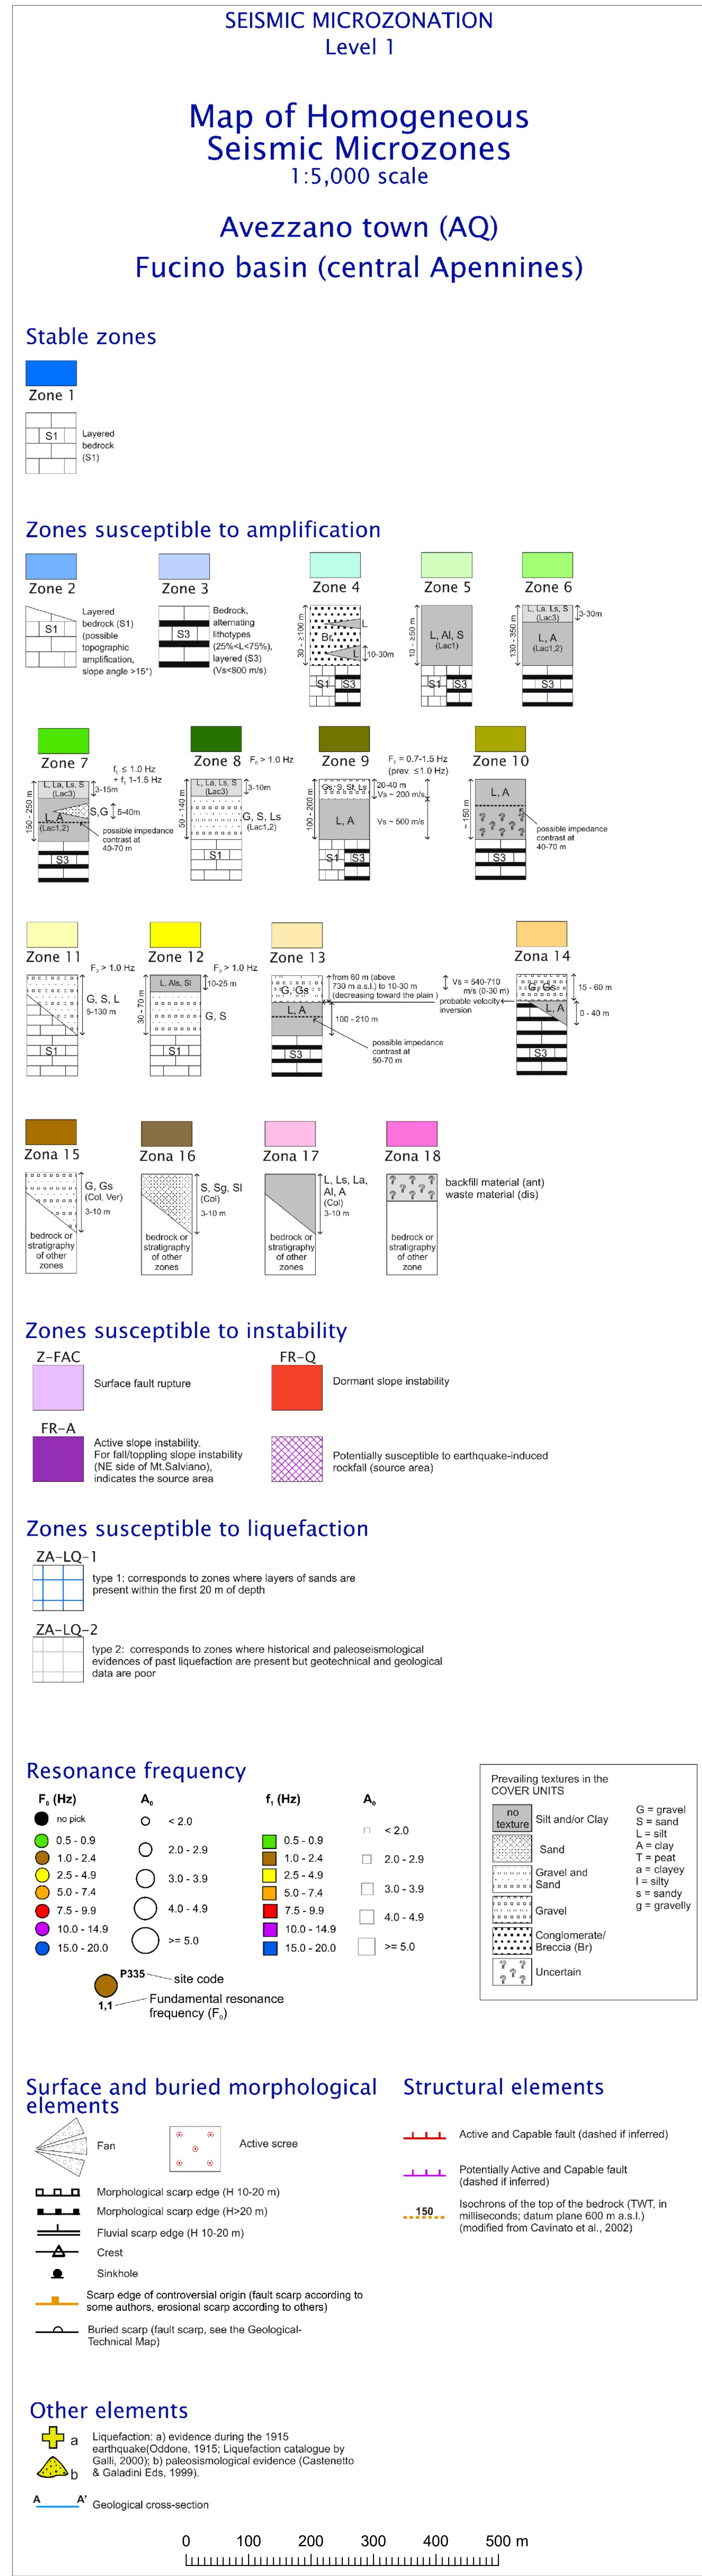

Supplement: Supplementary file 1 [file nhess-2016-313-supplement.zip]
